# Supplementary material for: Integrative review protocol for Indigenous youth participation in health equity promotion
Source: HighWire-hosted journal article supplement (doi:10.1136/bmjopen-2021-055568), 2022-07-01
Supplement: bmjopen-2021-055568supp001_data_supplement.pdf [file bmjopen-2021-055568supp001_data_supplement.pdf]

## Supplement 1: Search strategies using keywords and subject headings

### Scopus

((TITLE-ABS-KEY (Indigenous OR "first nations" OR inuit\* OR metis OR Nunavut OR Nunavik OR aboriginal OR "native American" OR "native americans" OR "alaska native" OR "Alaskan native" OR "alaska natives" OR "Alaskan natives" OR "native alaskans") OR TITLE-ABS-KEY (maori OR "torres strait island\*" OR koori OR goori OR murri OR nyoongah OR koorie OR yolngu OR anangu OR palawa OR nunga OR ngarrindjeri OR "murray island" OR "mer island") OR TITLE-ABS-KEY ("Indians north American" OR "American native continental ancestry group" OR "american indian" OR "oceanic ancestry group" OR aborigine\* OR indigen\* OR hawaii\* OR "ha waii\*")) AND (TITLE (youth\* OR adolescent\* OR teen\* OR student\* OR "young adult\*" OR "young people" OR "young person\*" OR "young women" OR "young men" OR "emerging adult\*")) AND (TITLE-ABS(voic\* OR participation OR participatory OR advisor\* OR council\* OR peer\* OR decisionmak\* OR "decision making" OR governance OR citizen\* OR civic "social action" OR sociopolitical OR {socio political} OR activis\* OR resurgence OR resistance OR {self determination} OR {political} OR {politics} OR protest\* OR {Indigenous led} OR "community action" OR "social justice" OR leader\* OR {youth led} OR {social change} or {engagement} OR network\* OR {social media})) AND (LIMIT-TO ( AFFILCOUNTRY,"United States" ) OR LIMIT-TO ( AFFILCOUNTRY,"Australia" ) OR LIMIT-TO ( AFFILCOUNTRY,"Canada" ) OR LIMIT-TO ( AFFILCOUNTRY,"New Zealand" ) ) AND ( LIMIT-TO ( DOCTYPE,"ar" ) OR LIMIT-TO ( DOCTYPE,"re" ) OR LIMIT-TO ( DOCTYPE,"ed" ) ) AND ( LIMIT-TO ( PUBYEAR,2022) OR LIMIT-TO ( PUBYEAR,2021) OR LIMIT-TO ( PUBYEAR,2020) OR LIMIT-TO ( PUBYEAR,2019) OR LIMIT-TO ( PUBYEAR,2018) OR LIMIT-TO ( PUBYEAR,2017) OR LIMIT-TO ( PUBYEAR,2016) OR LIMIT-TO ( PUBYEAR,2015) OR LIMIT-TO ( PUBYEAR,2014) OR LIMIT-TO ( PUBYEAR,2013) OR LIMIT-TO ( PUBYEAR,2012) OR LIMIT-TO ( PUBYEAR,2011) OR LIMIT-TO ( PUBYEAR,2010) OR LIMIT-TO ( PUBYEAR,2009) OR LIMIT-TO ( PUBYEAR,2008) OR LIMIT-TO ( PUBYEAR,2007) OR LIMIT-TO ( PUBYEAR,2006) OR LIMIT-TO ( PUBYEAR,2005) OR LIMIT-TO ( PUBYEAR,2004) OR LIMIT-TO ( PUBYEAR,2003) OR LIMIT-TO ( PUBYEAR,2002) OR LIMIT-TO ( PUBYEAR,2001) ) AND ( LIMIT-TO ( LANGUAGE,"English" ) )

### Medline

Ovid MEDLINE(R) and Epub Ahead of Print, In-Process, In-Data-Review & Other Non-Indexed Citations and Daily <1946 to March 07, 2022>

1 exp indigenous peoples/ or american native continental ancestry group/ or alaska natives/ or indians, north american/ or inuits/ or Oceanic Ancestry Group/ 30225

2 (Indigenous or First Nations or First Nation or Inuit\* or metis or Aboriginal or Native American\* or alaska native\* or (Alaska\* adj1 Native\*) or Ojibw\* or Cree or Athapaskan or Athabaskan or Athabaskan or Saulteau\* or Wakashan or Dene or Inuk or Tlicho or Haida or Ktunaxa or Tsimshian or Gitsxan or Nisga'a or Haisla or Heiltsuk or Oweenkeno or

Kwakwaka'wakw or Nuuchah-nulth or Tsilhqot'in or Dakelh or Wet'suwet'en or Sekani or Dunne-za or Dene or Tahltan or Kaska or Tagish or Tutchone or Nuxalk or Salish or Stl'atlimc or Nlaka'pamux or Okanagan or Secwepmíc or Tlingit or Anishinaabe or Anishinabe or Blackfoot or Nakoda or Tstine or Tsuut'ina or Gwich'in or Tagish or Tutchone or Algonquin or Algonkian or Nipissing or Kahnawake or Mohawk\* or Cherokee or Potawatomi or Innu or Maliseet or Mi'kmaq or Micmac or Passamaquoddy or Haudenosaunee or Cayuga or Dakota or Lakota or Navajo or Zuni or Hopi or Oneida or Onondaga or Seneca or Tuscarora or Wyandot or Indigeney or Nunavut\* or Iqaluit\* or Nunavummiut or Kitikmeot or Kivalliq or qikiqtani or Baffin or Kuujuaq or Inuvialuit or Nunavik or nunatsiavut or Inupiat or inupiaq or yupik or Yellowknife or northwest territories or Yukon or Whitehorse or Fairbanks or quajigiartiit or eskimo\* or maori\* or torres strait island\* or koori or goori or murri or nyoongah or Nyoongar or Noongar or Nyunga\* or koorie or yolngu or Anangu or palawa or nunga or Ngarrindjeri or murray island or mer island or american Indian\* or aborigine\* or indigen\* or Hawaii\* or hawaii\* or Menominee or Ahousat or Apache tribe or Arapahoe or Bella Coola or Paiute or Shoshone or Blackfeet or Cherokee or Cheyenne or Sioux or Siouan or Choctaw Indian\* or Choctaw Nation\* or Comanche nation or Kootenai Tribes or Dogrib or Flathead Nation or Flathead Reservation or Havasupai or Pima or Tohono O'odham).mp. 100032

3 (youth\* or adolescen\* or girl or girls or boy or boys or emerging adult\* or young or teen\* or dropout\*).ti. 411623

4 (social action or sociopolitical or socio political or activis\* or resurgence or resistance or self determination or political or politics or protest\* or Indigenous led or community action or social justice or leader\* or youth led or social change or engagement or network\* or social media or (health and equit\*) or (health and inequit\*) or participatory).ti,ab. 1647248

5 1 or 2 104264

6 3 and 4 and 5 517

7 limit 6 to (english language and yr="2000 - 2022") 487
