# Supplementary material for: Integrative review protocol for Indigenous youth participation in health equity promotion
Source: HighWire-hosted journal article supplement (doi:10.1136/bmjopen-2021-055568), 2022-07-01
Supplement: bmjopen-2021-055568supp002_data_supplement.pdf [file bmjopen-2021-055568supp002_data_supplement.pdf]

**Supplement 2: Academic research databases included in the IR search strategy**

| <b>Researcher Database Provider</b> | <b>Database Name</b>                                                                                                                                                                                                                                                                                                                                                         |
|-------------------------------------|------------------------------------------------------------------------------------------------------------------------------------------------------------------------------------------------------------------------------------------------------------------------------------------------------------------------------------------------------------------------------|
| EBSCOhost databases                 | Academic Search Complete; Canadian Reference Centre; Bibliography of Native North Americans; CINAHL; MasterFILE Premier; Family & Society Studies Worldwide; Child Development & Adolescent Studies; Criminal Justice Abstracts; Business Source Premier; SPORTDiscus; Teacher Reference Centre; Women's Studies International; Social Work Abstracts                        |
| ProQuest databases:                 | ABI/Inform; American Periodicals; Art & Architecture Archive; Art Bibliographies Modern (ABM); Canadian Business & Current Affairs; EconLit; ERIC; Music Periodicals Database; PAIS Index; Periodicals Archive Online; Philosopher's Index; Publicly Available Content Database; Sociological Abstracts; Worldwide Political Science Abstracts                               |
| Scopus interdisciplinary database   |                                                                                                                                                                                                                                                                                                                                                                              |
| OVID databases                      | Medline, EMBASE, and PsycINFO                                                                                                                                                                                                                                                                                                                                                |
| Indigenous research journals        | <ul style="list-style-type: none"> <li>• International Journal of Indigenous Health (IJIH)</li> <li>• First Peoples Child &amp; Family Review (FPCFR)</li> <li>• International Indigenous Policy Journal (IIPJ)</li> <li>• Journal of Indigenous Wellbeing: Te Mauri - Pimatisiwin</li> <li>• Journal of Indigenous Research</li> <li>• IK: Other Ways of Knowing</li> </ul> |
